# Supplementary material for: Towards N–N-Doped Carbon Dots: A Combined Computational and Experimental Investigation
Source: MDPI journal article supplement (doi:10.3390/ma15041468), 2022-02-16
Supplement: s1 [file s1]

# Towards N–N-doped Carbon Dots: a Combined Computational and Experimental Investigation

Chiara Olla <sup>1\*</sup>, Stefania Porcu <sup>1</sup>, Francesco Secci <sup>2</sup>, Pier Carlo Ricci <sup>1</sup> and Carlo Maria Carbonaro <sup>1,\*</sup>

<sup>1</sup> Department of Physics, University of Cagliari, Cittadella Universitaria, I-09042 Monserrato, Italy; chiara.olla@dsf.unica.it (C.O.); stefania.porcu@dsf.unica.it (S.P.); carlo.ricci@dsf.unica.it (P.C.R.); cm.carbonaro@dsf.unica.it (C.M.C.)

<sup>2</sup> Department of Chemistry and Geological Science, University of Cagliari, Cittadella Universitaria, I-09042 Monserrato, Italy; fsecci@unica.it (F.S.)

\* Correspondence: chiara.olla@dsf.unica.it (C.O.); cm.carbonaro@dsf.unica.it (C.M.C.)

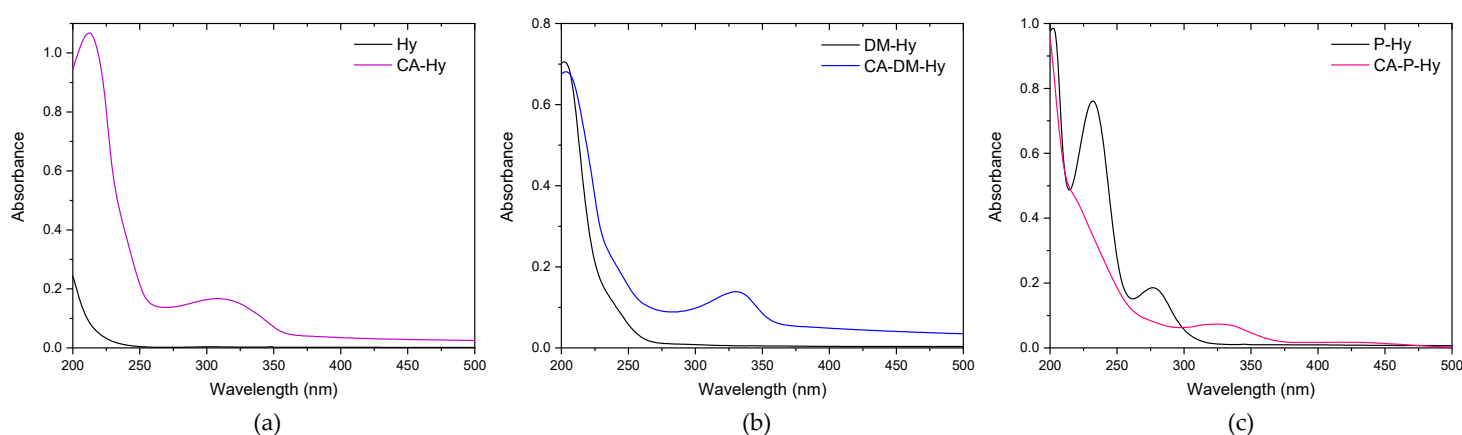

**Figure S1.** Absorption spectrum of hydrazine precursors compared to the corresponding product. (a) Hy and CA-Hy; (b) DM-Hy and CA-DM-Hy; (c) P-Hy and CA-P-Hy.

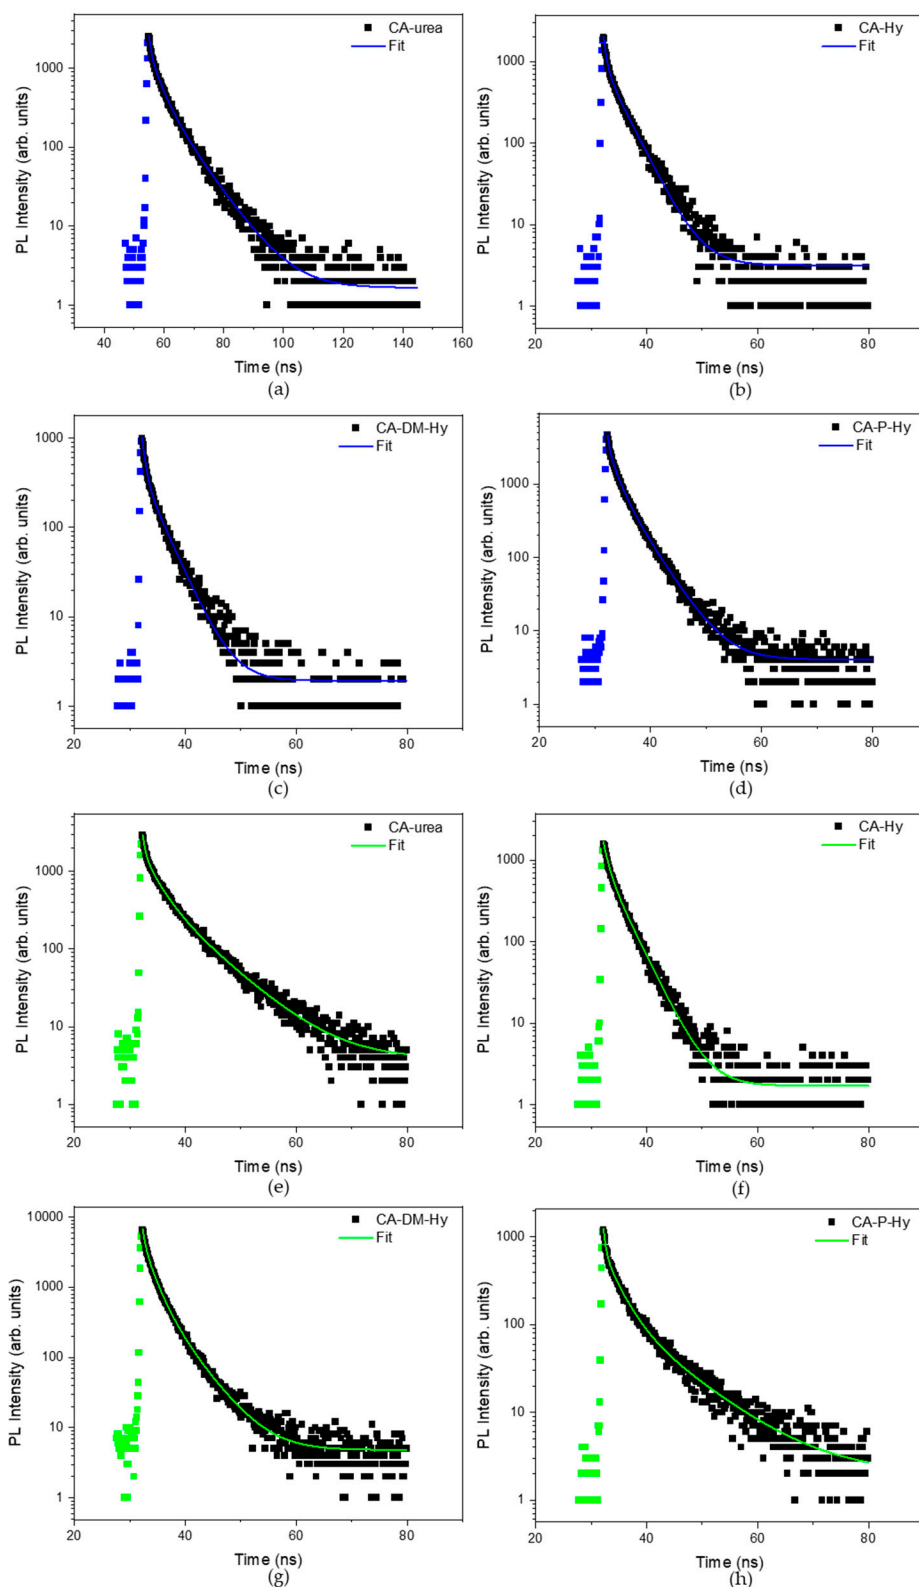

**Figure S2.** Decay times recorded under 350 nm (blue) and 410 nm (green) excitation light. (Risetime 0.7 in 100 ns, 0.4 in 50ns.) (a) CA-urea excited at 350 nm in 100 ns; (b) CA-Hy excited at 350 nm in 50 ns; (c) CA-DM-Hy excited at 350 nm in 50 ns; (d) CA-P-Hy excited at 350 nm in 50 ns; (e) CA-urea excited at 410 nm in 50 ns; (f) CA-Hy excited at 410 nm in 50 ns; (g) CA-DM-Hy excited at 410 nm in 50 ns; (h) CA-P-Hy excited at 410 nm in 50 ns.

**Equation S1.** The average lifetime was calculated as the weighted mean of the retrieved values<sup>1</sup>.

$$\bar{\tau} = \sum_{i=1}^n \frac{A_i \tau_i^2}{A_i \tau_i} = \sum_{i=1}^n f_i \tau_i \quad (1)$$

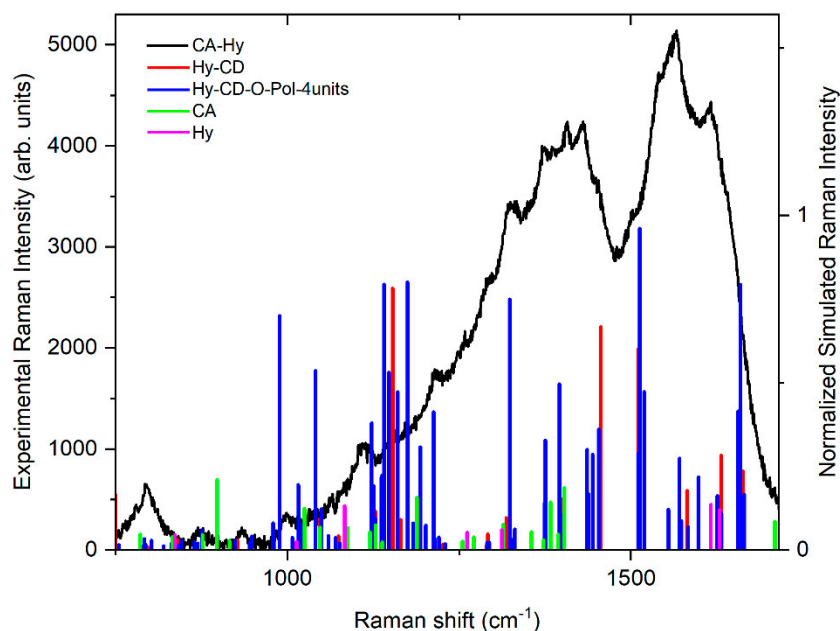

**Figure S3.** Comparison of experimental Raman spectrum of CA-Hy and computed Raman vibrations for precursors (CA and Hy) and possible Hy-CD structures.

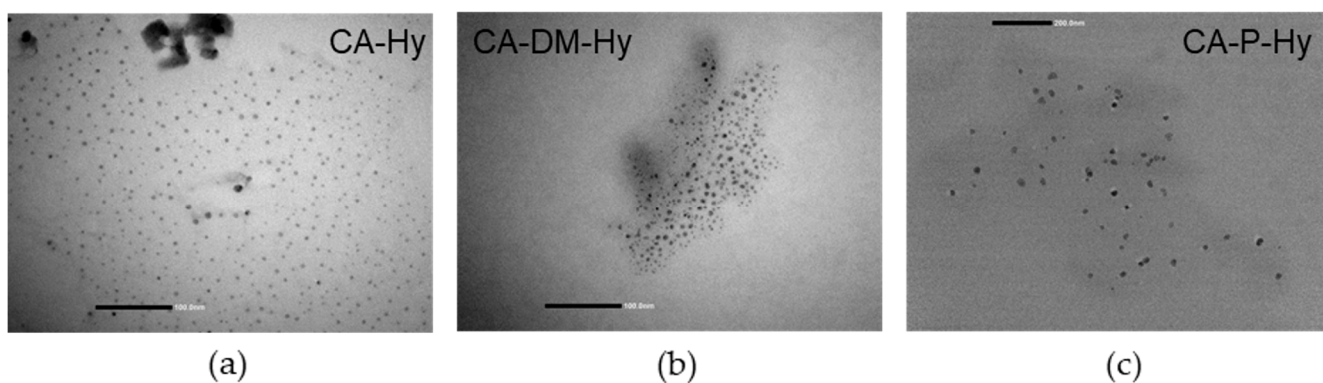

**Figure S4.** TEM images of CA-hydrazine compounds. (a) CA-Hy (100 nm scale bar); (b) CA-DM-Hy (100 nm scale bar); (c) CA-P-Hy (200 nm scale bar).

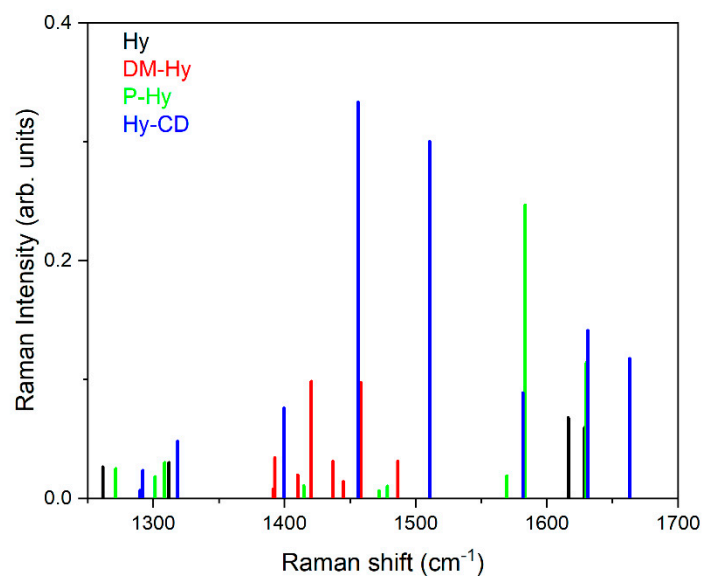

**Figure S5.** Computed Raman vibrations for hydrazine precursors and Hy-CD structure.

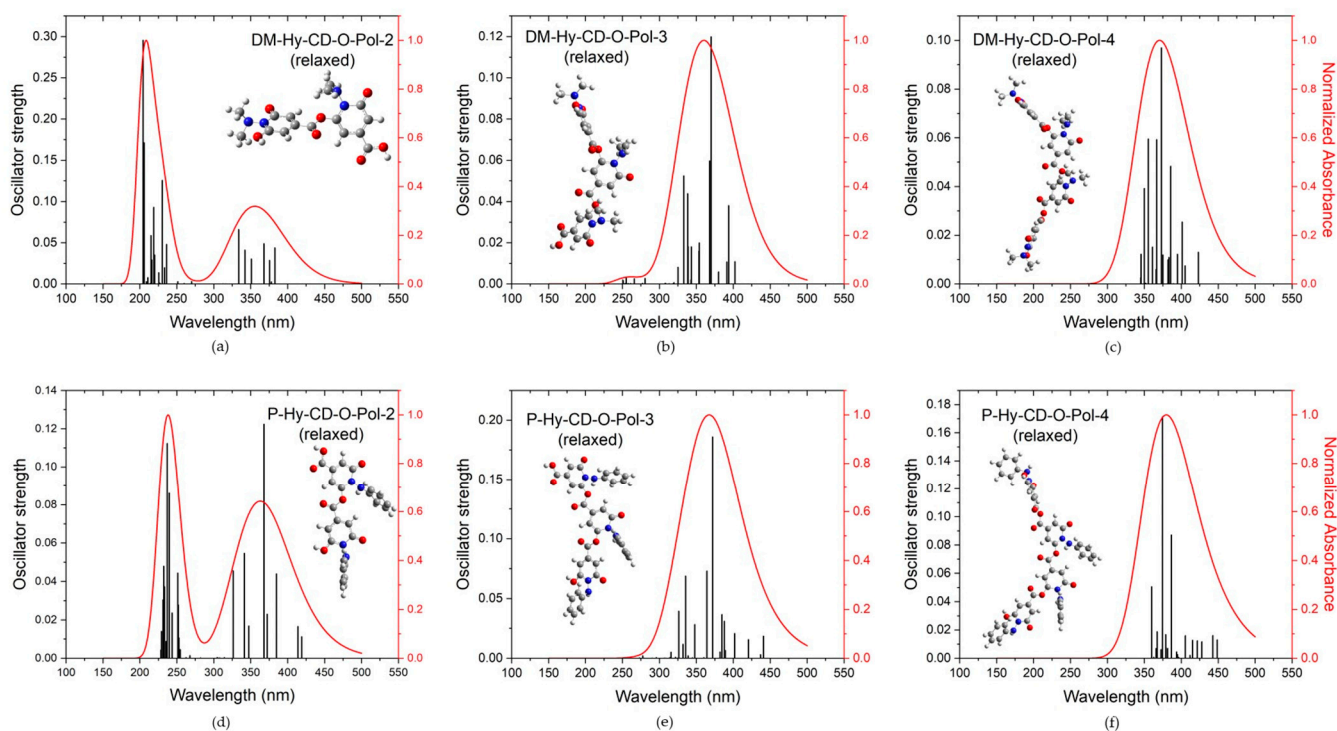

**Figure S6.** Simulated absorbance spectra and oscillator strength of DM- and P-Hy-CD polymers. The insets report the ball-and-stick representation of the structures (H atom—white sphere, C atom—grey sphere, N atom—blue sphere, O atom—red sphere). (a) DM-Hy-CD-O-Pol-2; (b) DM-Hy-CD-O-Pol-3; (c) DM-Hy-CD-O-Pol-4; (d) P-Hy-CD-O-Pol-2; (e) P-Hy-CD-O-Pol-3; (f) P-Hy-CD-O-Pol-4.

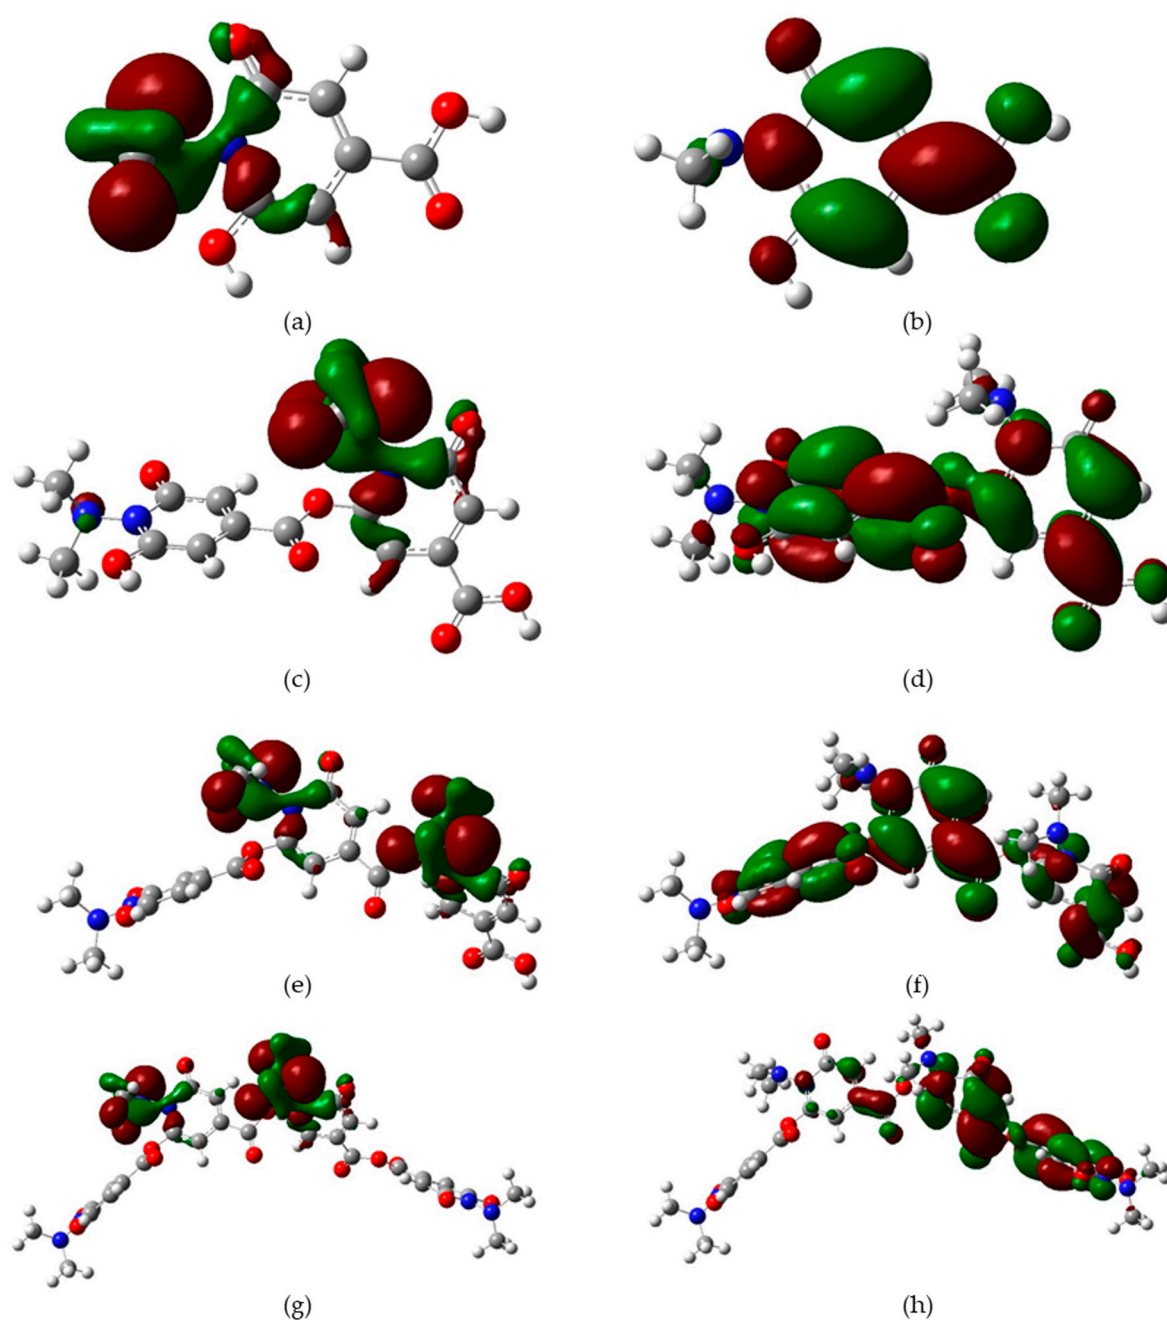

**Figure S7.** MOs of the HOMO–LUMO states (HOMO on the left and LUMO on the right) for the DM-Hy-CD system (**a,b**) and its O-Polymer derived system: DM-Hy-CD-O-Pol-2 (**c,d**), DM-Hy-CD-O-Pol-3 (**e,f**), DM-Hy-CD-O-Pol-4 (**g,h**). The isocontour value is 0.02 au (H atom—white sphere, C atom—grey sphere, N atom—blue sphere, O atom—red sphere).

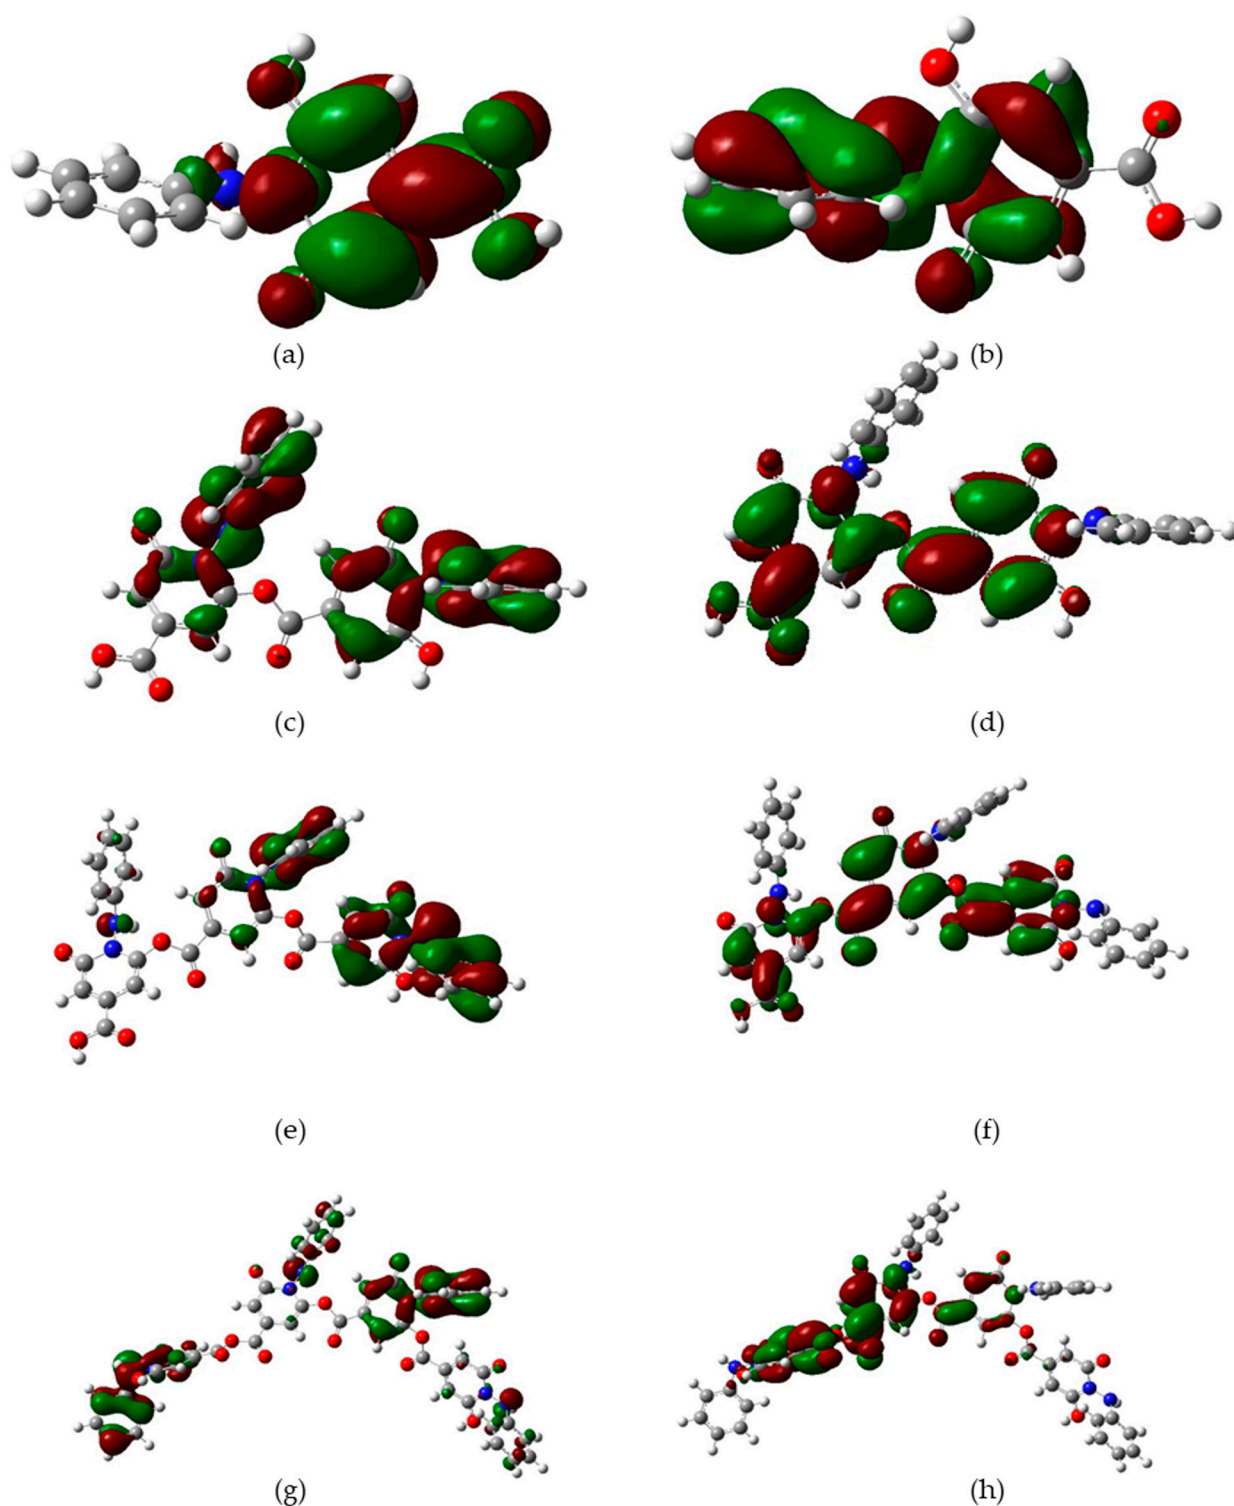

**Figure S8.** MOs of the HOMO–LUMO states (HOMO on the left and LUMO on the right) for the P-Hy-CD system (**a,b**) and its O-Polymer derived system: P-Hy-CD-O-Pol-2 (**c,d**), P-Hy-CD-O-Pol-3 (**e,f**), P-Hy-CD-O-Pol-4 (**g,h**). The isocontour value is 0.02 au (H atom—white sphere, C atom—grey sphere, N atom—blue sphere, O atom—red sphere).

## References

1. Lakowicz, J. R. *Principles of Fluorescence Spectroscopy*; Springer US: Boston, MA, 2006. <https://doi.org/10.1007/978-0-387-46312-4>.
